# Supplementary material
Source: PubMed Central journal article supplement (PMC4529778)
Supplement: NIHMS705204-supplement-1.pdf [file NIHMS705204-supplement-1.pdf]

Table2

| <b>Antibody</b>     | <b>Source</b> | <b>Company</b> | <b>Dilution</b> | <b>Catalog Number</b> |
|---------------------|---------------|----------------|-----------------|-----------------------|
| Sox9                | Rabbit        | Millipore      | 1:400           | AB5535                |
| Sox9                | Rabbit        | Santa Cruz     | 1:50            | Sc-20095              |
| Smooth Muscle Actin | Mouse         | Sigma          | 1:2k            | A5228                 |
| NKX2.1              | Guinea Pig    | Seven Hills    | 1:100           | n/a                   |
| NKX2.1              | Mouse         | Seven Hills    | 1:400           | n/a                   |
| GFP                 | Chicken       | Abcam          | 1:200           | AB13970               |
| BrdU                | Sheep         | Abcam          | 1:200           | AB1893                |
| BrdU                | Mouse         | Santa Cruz     | 1:4k            | Sc-32323              |
