# Supplementary material
Source: PubMed Central journal article supplement (PMC4529778)
Supplement: NIHMS705204-supplement-2.pdf [file NIHMS705204-supplement-2.pdf]

**Table 1**

| <b>Gene</b>   | <b>Primer</b>   | <b>Sequence</b>                      |
|---------------|-----------------|--------------------------------------|
| Wntless (EVI) | KO Forward (p1) | 5'CTT CCC TGC TTC TTT AAG CGT C 3'   |
| Wntless (EVI) | Forward (p2)    | 5'AGG CTT CGA ACG TAA CTG ACC 3'     |
| Wntless (EVI) | Reverse (p4)    | 5'CTC AGA ACT CCC TTC TTG AAG C 3'   |
| Sox9          | KO Forward (F1) | 5'CTC CGG TAG CAA AGG CGT TTA G 3'   |
| Sox9          | Forward (F2)    | 5'CCG GCT GCT GGG AAA GTA TAT G 3'   |
| Sox9          | Reverse (R)     | 5'CGC TGG TAT TCA GGG AGG TAC A 3'   |
| Dermo1 Cre    | General Cre Rev | 5'AGA GAC GGA AAT CCA TCG CTC G 3'   |
| Dermo1 Cre    | General Cre Fwd | 5'TGC CAC GAC CAA GTG ACA GCA ATG 3' |
| Col2a1 Cre    | Col2a1 Cre Rev  | 5'CCT GAT CCT GGC AAT TTC GGC TA 3'  |
| Col2a1 Cre    | Col2a1 Cre Fwd  | 5'TCC AAT TTA CTG ACC GTA CAC CAA 3' |
| Axin2-LacZ    | LacZ Rev        | 5'GCG TGG GCG TAT TCG CCA AGG A 3'   |
| Axin2-LacZ    | LacZ Fwd        | 5'TGG GGA ATG AAT CAG GCC ACG G 3'   |
| Tomato        | Common Fwd      | 5'CTC TGC TGC CTC CTG GCT TCT 3'     |
| Tomato        | Wild Type Rev   | 5'CGA GGC GGA TCA CAA GCA ATA 3'     |
| Tomato        | Mutant Rev      | 5'TCA ATG GGC GGG GGT CGT T 3'       |
