# Supplementary material
Source: PubMed Central journal article supplement (PMC4529778)
Supplement: NIHMS705204-supplement-8.pdf [file NIHMS705204-supplement-8.pdf]

Supplementary material

**Supplementary material legends**

**Supplementary table1: Primers utilized for genotyping.**

**Supplementary table 2: List of antibodies utilized for these studies.**

**Supplementary Figure 1: *Wls* was efficiently deleted from tracheal tissue by Cre mediated recombinase activity.** DNA from E11.5 embryonic tracheal tissue was isolated to confirm deletion of *Wls* by PCR. Primers P2-P4 were utilized to detect a 441 bp WT band and a 556 bp *Wls<sup>fl</sup>* Neo deleted band, while primers P1-P4 detected a 1,625 bp WT band and a 410 bp- null band validating Cre mediated deletion of *Wls* in *Wls<sup>flf</sup>;Shh<sup>Cre/+</sup>* tracheal tissue.

**Supplementary figure 2: Wnt ligands are expressed in developing respiratory tract and body wall.** In situ hybridization was performed to detect transcripts for *Wnt2*, *Wnt2b* and *Wnt11*. *Wnt2* and *Wnt2b* transcripts were detected in the periphery of the developing lung; *Wnt11* expression was detected in the mesenchyme of the body wall. Higher magnification of the areas in squares are shown. *Ppib* transcripts, a housekeeping control, were detected throughout the embryo while *Dapb* transcripts, a bacterial gene, were not detected in embryonic mouse samples.

**Supplementary figure 3: Epithelial deletion of *Wls* causes tracheomalacia and severely impaired Sox9 expression.** Cross sections of E18.5 embryos were stained with Sox9 and  $\alpha$ SMA antibody. In control embryos tracheal mesenchyme Sox9 expression was observed in sites where cartilage was formed while  $\alpha$ SMA staining was restricted to

## Supplementary material

the dorsal aspect labeling trachealis muscle. In contrast, Sox9 staining was virtually absent from the *Wls<sup>flf</sup>;Shh<sup>Cre/+</sup>* tracheal mesenchyme while  $\alpha$ SMA was present across the tracheal mesenchyme (A). Higher magnifications of images depicting trachea and esophagus are shown in panel B. T=trachea, E=esophagus.

**Supplementary Figure 4: Deletion of Sox9 from the tracheal mesenchymal impaired cartilage formation.** Whole mount images of E18.5 embryos depict the anomalous and short forelimbs as well as micrognathia (arrows B, D) observed after mesenchymal deletion of *Sox9* (B, D). Alcian blue staining was near absent in E18.5 tracheas of *Sox9<sup>flf</sup>;Col2a1<sup>Cre/+</sup>* mice (F). Tracheal cartilaginous rings in *Sox9<sup>flf</sup>;Dermo1<sup>Cre/+</sup>* embryos, were abnormal and reduced in number resulting in a shorter trachea (H).

**Supplementary Figure 5: Mesenchymal Wls is not required for Sox9 expression or tracheal cartilage formation.** *Wls<sup>flf</sup>;Dermo1<sup>Cre/+</sup>* mice were bred to *Rosa mT/mG* mice. Longitudinal sections stained for Nkx2.1, Sox9 and GFP antibody showed specific recombination in tracheal mesenchyme driven by Cre recombinase in control and *Wls<sup>flf</sup>;Dermo1<sup>Cre/+</sup>* at E12.5 (A, B). Sox9 was expressed in control (C) and *Wls<sup>flf</sup>;Dermo1<sup>Cre/+</sup>* tracheal mesenchyme of E12.5 embryos (D). RT-PCR analysis showed similar levels of *Sox9* and *Col2a1* mRNA in tracheal tissue of *Wls<sup>flf</sup>;Dermo1<sup>Cre/+</sup>* and control embryos (E). Alcian blue staining of E18.5 tracheal tissue showed that cartilage was present in tracheal mesenchyme of *Wls<sup>flf</sup>;Col2a1<sup>Cre/+</sup>* embryos (F). T=trachea.

## Supplementary material
